# Supplementary material for: Heteroelement Y-doped α-Ni(OH)2nanosheets with excellent pseudocapacitive performance
Source: Royal Society of Chemistry journal article supplement (doi:10.1039/c7ta00963a), 2017-01-01
Supplement: c7ta00963a1.pdf [file c7ta00963a1.pdf]

## Supporting Information

### Heteroelement Y-Doped $\alpha$ -Ni(OH)<sub>2</sub> Nanosheets with Excellent Pseudocapacitive Performance

*Yao Zhang,<sup>a</sup> Yufei Zhao,<sup>b</sup> Weidan An,<sup>a</sup> Li Xing,<sup>a</sup> Yanfang Gao,<sup>\*a</sup> and Jinrong Liu<sup>\*a</sup>*

*a.* School of Chemical Engineering, Inner Mongolia University of Technology, No.  
49 Aimin Street, Xincheng District, Hohhot 010051, P. R. China.

*b.* Key Laboratory of Photochemical Conversion and Optoelectronic Materials,  
Technical Institute of Physics and Chemistry, Chinese Academy of Sciences, Beijing  
100190, P. R. China.

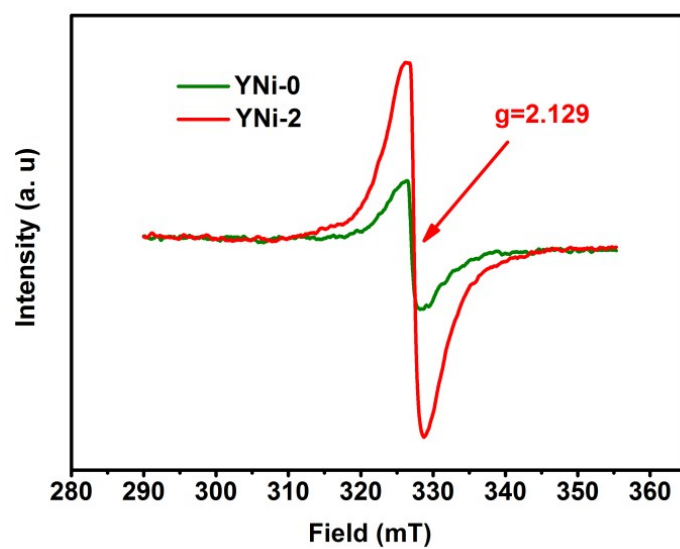

Figure S1 ESR spectrum of YNi-0 and YNi-2 nanosheets at 110 K (both samples amount used 50 mg).

**Table S1 The peak position and peak area of Ni<sup>2+</sup> and Ni<sup>3+</sup> in Ni 2p 3/2 and Ni 2p 1/2.**

| Ni            |                  | Ni 2p 3/2        |                  |                  |                  | Ni 2p 1/2        |                  |                  |  |
|---------------|------------------|------------------|------------------|------------------|------------------|------------------|------------------|------------------|--|
| Element       |                  | Ni <sup>2+</sup> |                  | Ni <sup>3+</sup> |                  | Ni <sup>2+</sup> |                  | Ni <sup>3+</sup> |  |
| Valence State | Ni <sup>2+</sup> |                  | Ni <sup>3+</sup> |                  | Ni <sup>2+</sup> |                  | Ni <sup>3+</sup> |                  |  |
|               | Peak Position    | Peak Area        |  |
| YNi-0         | 855.4            | 66623.48         | 857.1            | 7746.80          | 873.1            | 41209.23         | 874.8            | 4175.33          |  |
| YNi-1         | 855.5            | 58339.47         | 857.4            | 19734.43         | 873.2            | 33205.45         | 875.0            | 8968.56          |  |
| YNi-2         | 855.6            | 30200.89         | 857.4            | 15451.01         | 873.3            | 21853.73         | 875.1            | 7030.53          |  |
| YNi-3         | 855.6            | 29413.60         | 857.9            | 9203.92          | 873.4            | 16526.80         | 875.5            | 3658.86          |  |

**Table S2 Summary of the physical characteristics of YNi-0, YNi-1, YNi-2 and YNi-3.**

| <b>Sample</b>                                                       | <b>YNi-0</b> | <b>YNi-1</b> | <b>YNi-2</b> | <b>YNi-3</b> |
|---------------------------------------------------------------------|--------------|--------------|--------------|--------------|
| <b>Specific Surface Area(m<sup>2</sup> g<sup>-1</sup>)</b>          | 38.25        | 126.33       | 378.95       | 135.36       |
| <b><math>V_{\text{total}}</math>(cm<sup>3</sup> g<sup>-1</sup>)</b> | 0.104096     | 0.289710     | 0.736477     | 0.343762     |
| <b><math>V_{\text{mic}}</math>(cm<sup>3</sup> g<sup>-1</sup>)</b>   | 0.002726     | 0.014402     | 0.033039     | 0.012056     |
| <b><math>V_{\text{mec}}</math>(cm<sup>3</sup> g<sup>-1</sup>)</b>   | 0.085828     | 0.263119     | 0.674853     | 0.320800     |
| <b><math>V_{\text{mac}}</math>(cm<sup>3</sup> g<sup>-1</sup>)</b>   | 0.015542     | 0.012189     | 0.028586     | 0.010906     |
| <b><math>V_{\text{mic}}/ V_{\text{total}}</math>(%)</b>             | 2.6          | 5.0          | 4.5          | 3.5          |
| <b><math>V_{\text{mec}}/ V_{\text{total}}</math>(%)</b>             | 82.5         | 90.8         | 91.6         | 93.3         |
| <b><math>V_{\text{mac}}/ V_{\text{total}}</math>(%)</b>             | 14.9         | 4.2          | 3.9          | 3.2          |

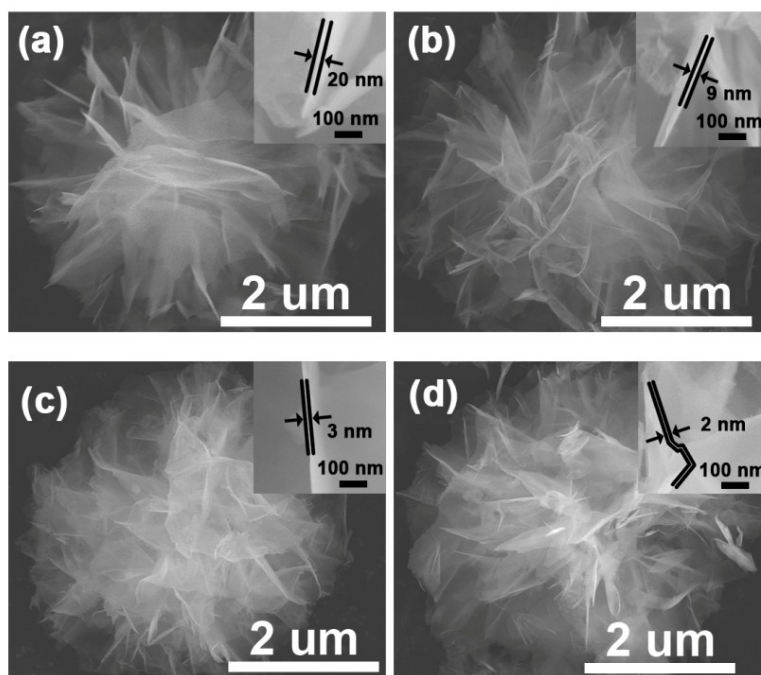

**Figure S2 SEM images of (a) YNi-0, (b) YNi-1, (c) YNi-2 and (d) YNi-3, respectively.**

The EDX data demonstrate that all the samples are mainly composed of Ni, O and Y elements. The quantitative analyses about the quality and atom percentage of the YNi-1, YNi-2 and YNi-3 are tabulated as follows:

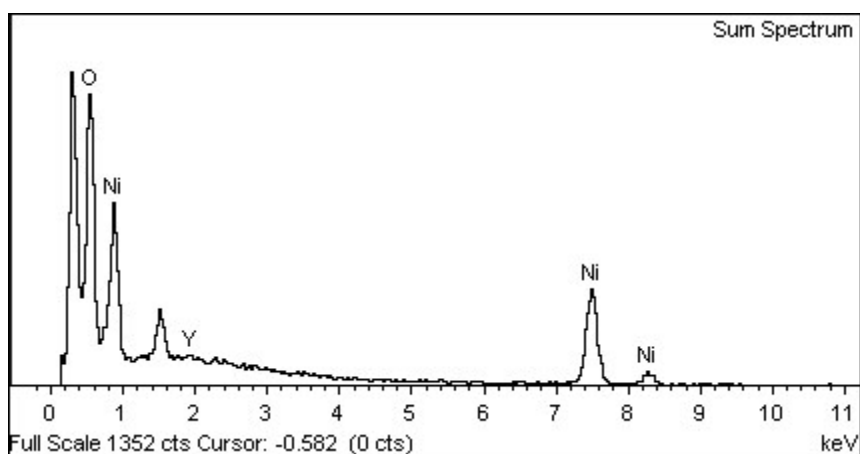

**Figure S3 EDX pattern of the YNi-1.**

**Table S3 The quality and atom percentage of YNi-1.**

| <b>Element</b> | <b>Weight%</b> | <b>Atomic%</b> |
|----------------|----------------|----------------|
| O K            | 52.56          | 80.42          |
| Ni K           | 45.99          | 19.18          |
| Y L            | 1.45           | 0.40           |
| Totals         | 100.00         |                |

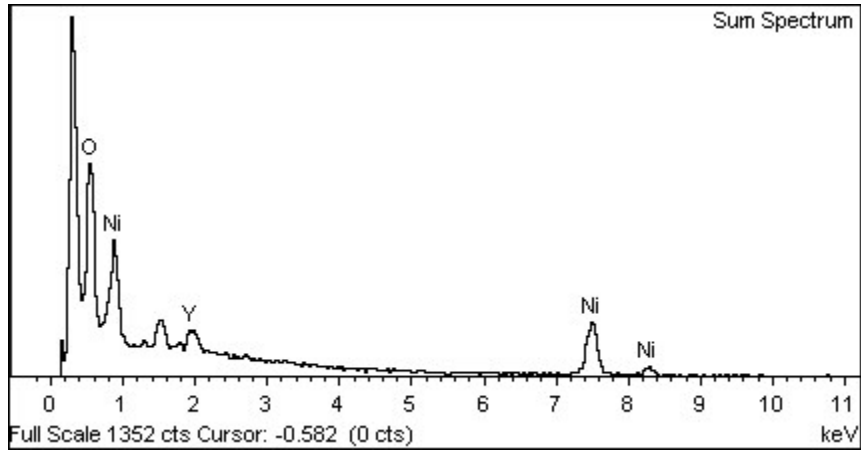

Figure S4 EDX pattern of the YNi-2.

Table S4 The quality and atom percentage of YNi-2.

| Element | Weight% | Atomic% |
|---------|---------|---------|
| O K     | 56.88   | 83.74   |
| Ni K    | 35.50   | 14.24   |
| Y L     | 7.62    | 2.02    |
| Totals  | 100.00  |         |

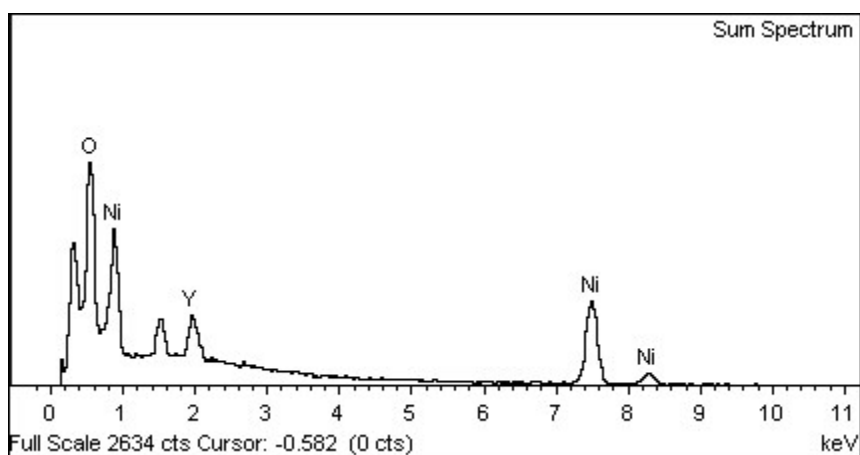

**Figure S5 EDX pattern of the YNi-3.**

**Table S5 The quality and atom percentage of YNi-3.**

| Element | Weight% | Atomic% |
|---------|---------|---------|
| O K     | 46.90   | 77.78   |
| Ni K    | 41.53   | 18.77   |
| Y L     | 11.58   | 3.46    |
| Totals  | 100.00  |         |



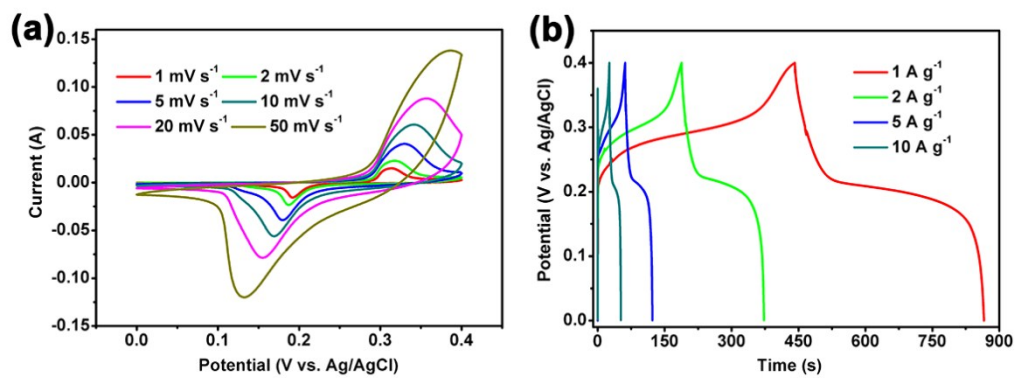

Figure S6 (a) CV curves of the YNi-0 at different scan rates from 1 to 50 mV s<sup>-1</sup>, and (b)

GCD curves of the YNi-0 at different current densities from 1 to 10 A g<sup>-1</sup>.

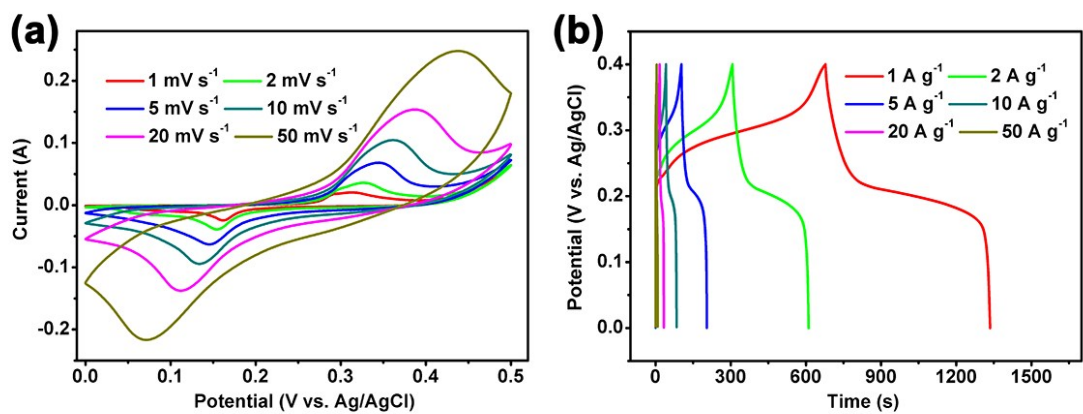

Figure S7 (a) CV curves of the YNi-1 at different scan rates from 1 to 50 mV s<sup>-1</sup>, and (b)

GCD curves of the YNi-1 at different current densities from 1 to 50 A g<sup>-1</sup>.

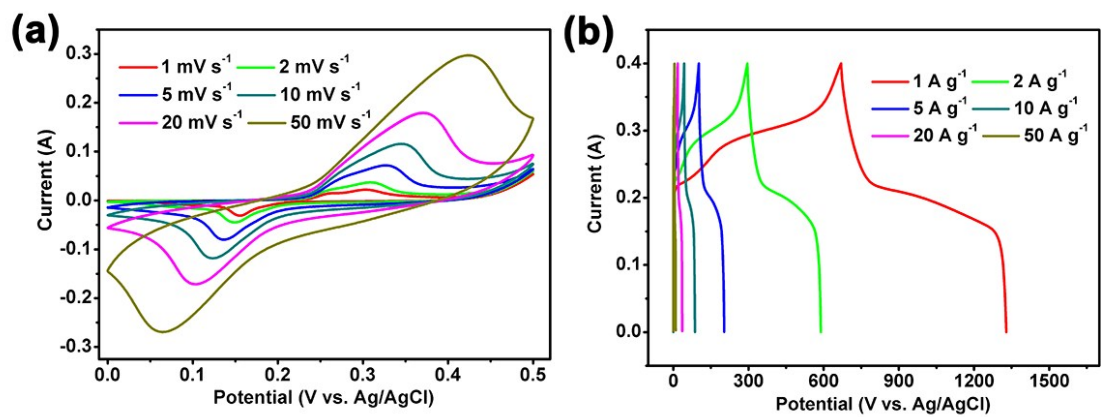

Figure S8 (a) CV curves of the YNi-3 at different scan rates from 1 to 50  $\text{mV s}^{-1}$ , and (b)

GCD curves of the YNi-3 at different current densities from 1 to 50  $\text{A g}^{-1}$ .

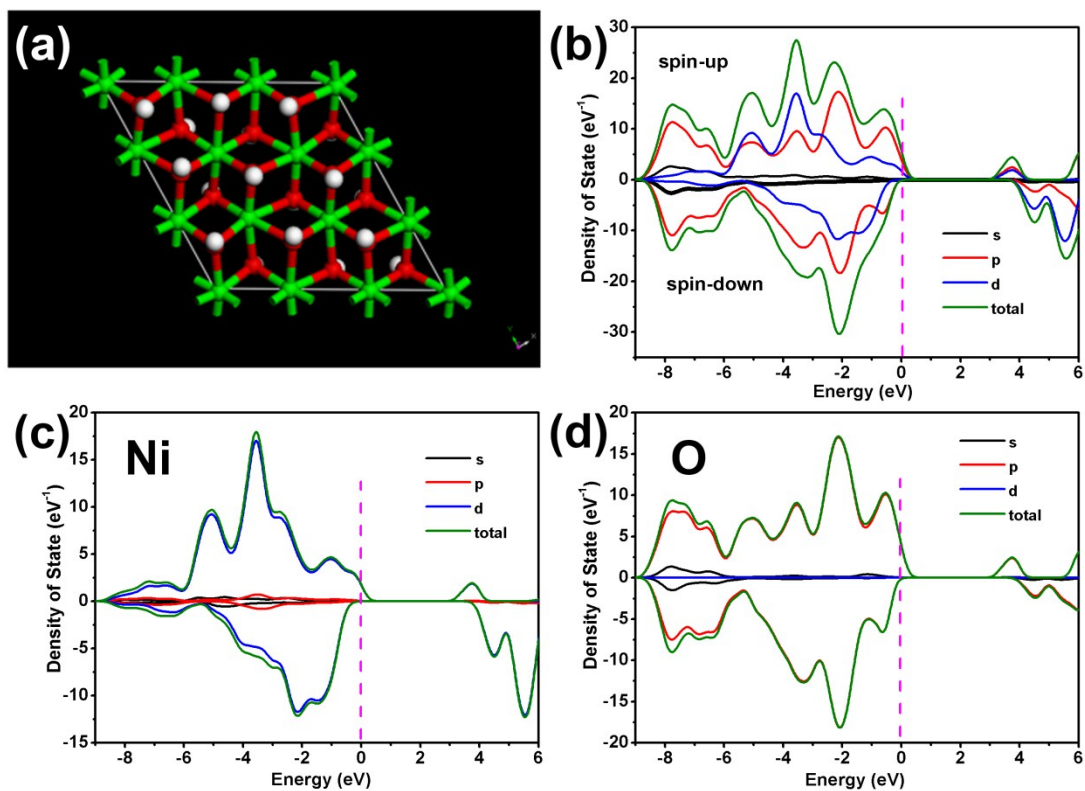

Figure S9 (a) Schematic structure model of pure  $a$ -Ni(OH)<sub>2</sub> single layer viewed along the  $c$ -axis, (b) calculated total DOS/PDOS, (c) Ni element and (d) O element for pure  $a$ -Ni(OH)<sub>2</sub>.

The Fermi level was denoted by the vertical line.

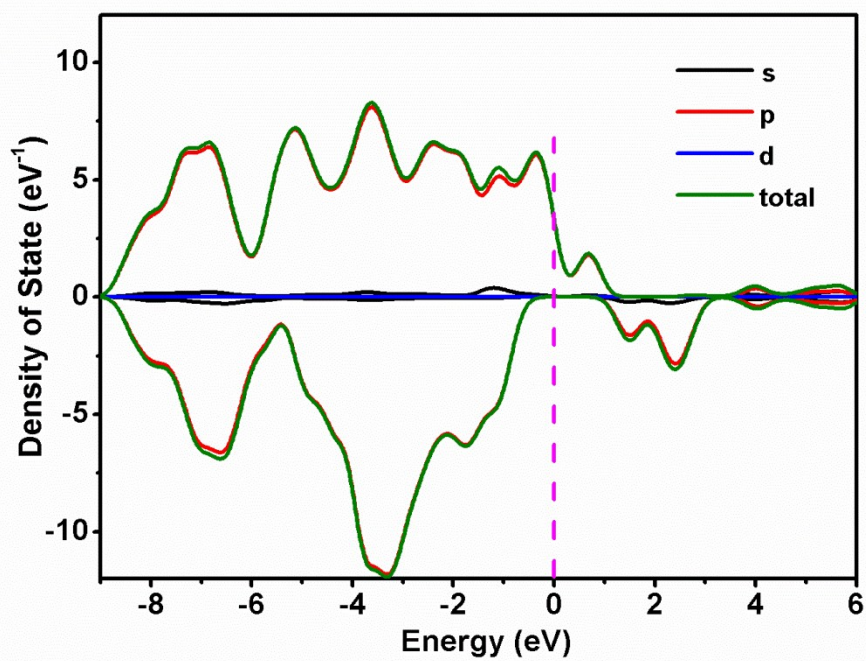

Figure S10 Calculated PDOS for O element in 12% Y-doped  $\alpha$ -Ni(OH)<sub>2</sub>.

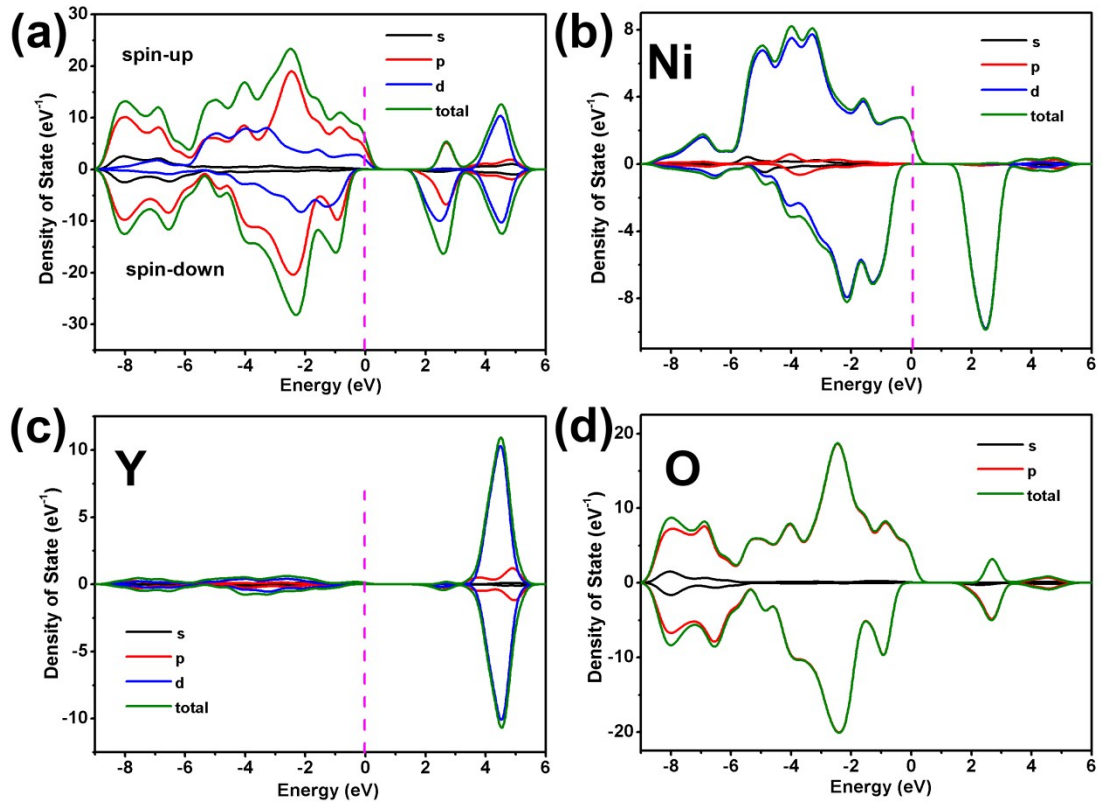

Figure S11 (a) Calculated total DOS/PDOS, (b) Ni element, (c) Y element and (d) O element for 33%Y-doped Ni(OH)<sub>2</sub>. The Fermi level was denoted by the vertical line.
